# Supplementary material
Source: PubMed Central journal article supplement (PMC4102971)
Supplement: cn500082p_si_001.pdf [file cn500082p_si_001.pdf]

**Method Notes**

XTerra MS C-18, 5um, 3.9x150 mm column  
40-60% Acetonitrile with 0.1% TFA- Water with 0.1% TFA  
1 ml/min

Compound  
Detection

2-PCCA (1)  
254 nm

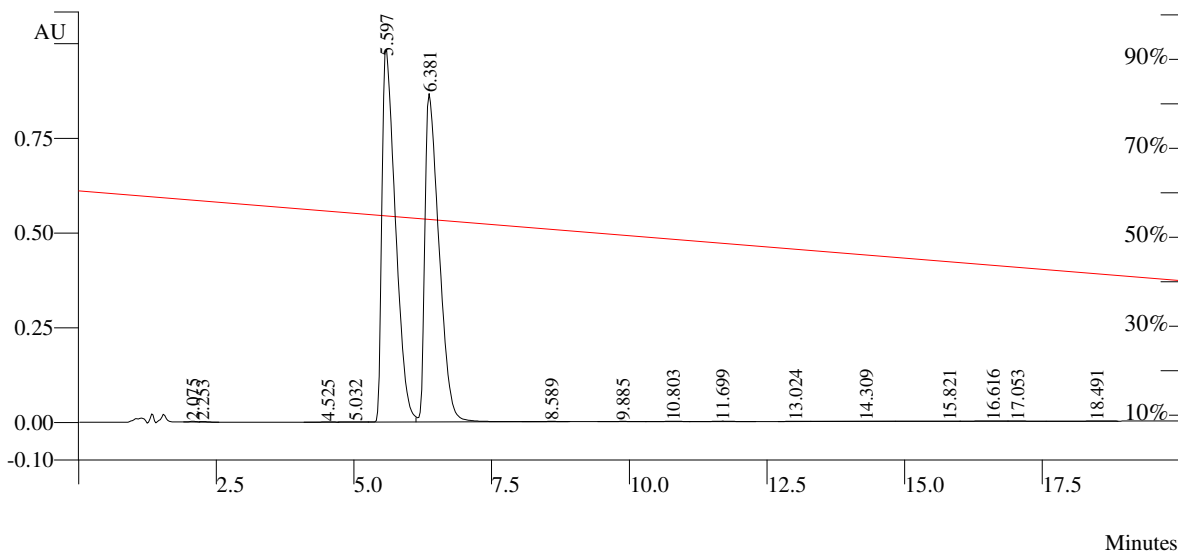

| Peak No         | Result (%) | Ret Time (min) | Rel Ret Time | Sep. Code | Width 1/2 (sec) | Peak Area (counts) | Peak Height (counts) |
|-----------------|------------|----------------|--------------|-----------|-----------------|--------------------|----------------------|
| 1               | 0.0617     | 2.075          | 0.00         | BV        | 7.4             | 102800             | 12327                |
| 2               | 0.0427     | 2.253          | 0.00         | VB        | 9.0             | 71213              | 8084                 |
| 3               | 0.0293     | 4.525          | 0.00         | BV        | 16.6            | 48858              | 3323                 |
| 4               | 0.0415     | 5.032          | 0.00         | VV        | 29.4            | 69242              | 3484                 |
| 5               | 51.6527    | 5.597          | 0.00         | VV        | 16.0            | 86115488           | 5040385              |
| 6               | 47.6916    | 6.381          | 0.00         | VB        | 16.8            | 79511512           | 4442367              |
| 7               | 0.0354     | 8.589          | 0.00         | TS        | 0.0             | 59027              | 4755                 |
| 8               | 0.0373     | 9.885          | 0.00         | BV        | 17.0            | 62140              | 3573                 |
| 9               | 0.0667     | 10.803         | 0.00         | VV        | 16.5            | 111153             | 6119                 |
| 10              | 0.0725     | 11.699         | 0.00         | VB        | 20.3            | 120871             | 5635                 |
| 11              | 0.0271     | 13.024         | 0.00         | BV        | 14.6            | 45183              | 2991                 |
| 12              | 0.0588     | 14.309         | 0.00         | VP        | 32.2            | 98027              | 2654                 |
| 13              | 0.0153     | 15.821         | 0.00         | PV        | 28.8            | 25490              | 1713                 |
| 14              | 0.0927     | 16.616         | 0.00         | VV        | 58.9            | 154524             | 4333                 |
| 15              | 0.0418     | 17.053         | 0.00         | VP        | 72.3            | 69737              | 3632                 |
| 16              | 0.0329     | 18.491         | 0.00         | PB        | 0.0             | 54789              | 2961                 |
| <b>100.0000</b> |            |                |              |           |                 | <b>166720048</b>   | <b>9548336</b>       |

**Method Notes**

XTerra MS C-18, 5um, 3.9x150 mm column  
40-60% Acetonitrile with 0.1% TFA- Water with 0.1% TFA  
1 ml/min

Compound **2**  
Detection 254 nm

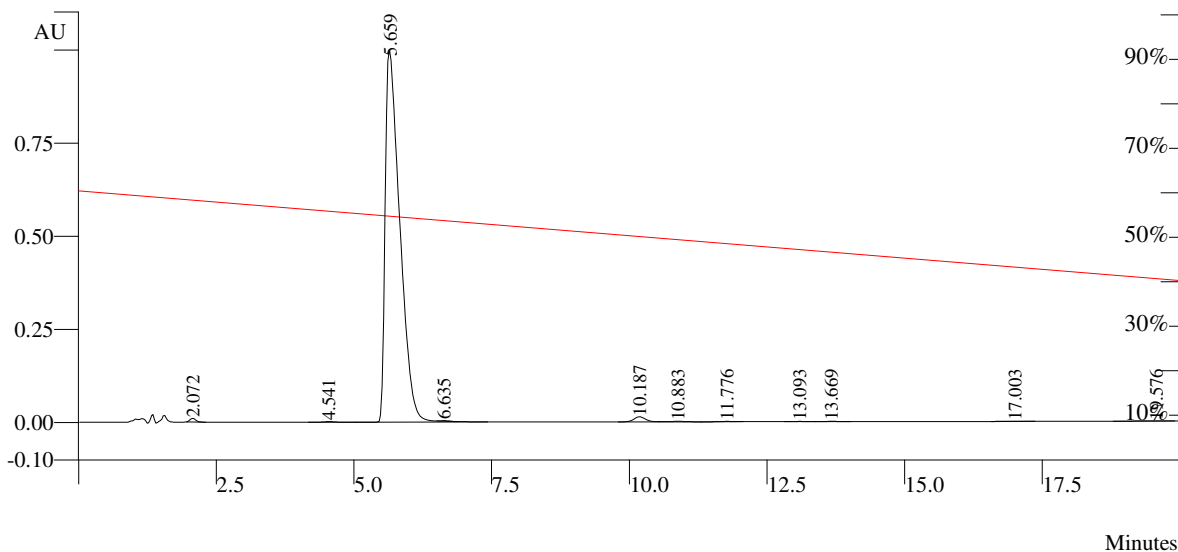

| Peak No         | Result (%) | Ret Time (min) | Rel Ret Time | Sep. Code | Width 1/2 (sec) | Peak Area (counts) | Peak Height (counts) |
|-----------------|------------|----------------|--------------|-----------|-----------------|--------------------|----------------------|
| 1               | 0.3824     | 2.072          | 0.00         | BB        | 7.0             | 369218             | 50489                |
| 2               | 0.1317     | 4.541          | 0.00         | BP        | 12.8            | 127135             | 9354                 |
| 3               | 97.9145    | 5.659          | 0.00         | PB        | 17.3            | 94542536           | 5128884              |
| 4               | 0.0857     | 6.635          | 0.00         | TS        | 0.0             | 82773              | 7429                 |
| 5               | 1.0440     | 10.187         | 0.00         | BV        | 13.8            | 1008000            | 67903                |
| 6               | 0.1293     | 10.883         | 0.00         | VP        | 15.7            | 124837             | 6965                 |
| 7               | 0.0583     | 11.776         | 0.00         | PB        | 17.3            | 56280              | 4376                 |
| 8               | 0.0472     | 13.093         | 0.00         | BV        | 14.6            | 45532              | 3106                 |
| 9               | 0.0566     | 13.669         | 0.00         | VB        | 15.5            | 54692              | 3604                 |
| 10              | 0.0523     | 17.003         | 0.00         | BB        | 16.6            | 50458              | 3167                 |
| 11              | 0.0981     | 19.576         | 0.00         | BB        | 0.0             | 94766              | 2997                 |
| <b>100.0001</b> |            |                |              |           |                 | <b>96556232</b>    | <b>5288274</b>       |

**Method Notes**

XTerra MS C-18, 5um, 3.9x150 mm column  
40-60% Acetonitrile with 0.1% TFA- Water with 0.1% TFA  
1 ml/min

Compound

**3**

Detection

254 nm

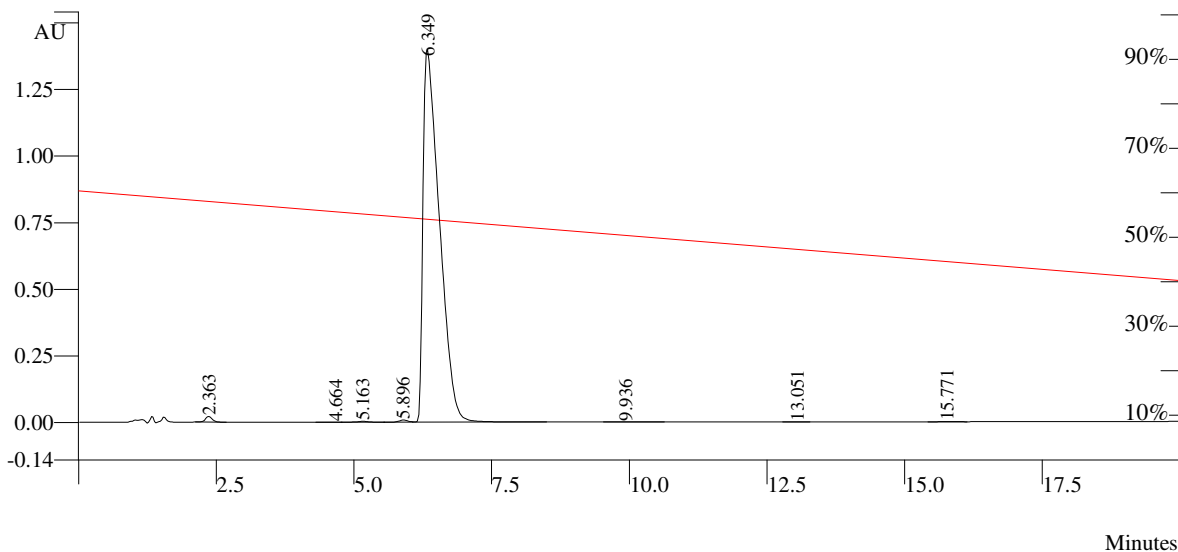

| Peak No | Result (%)      | Ret Time (min) | Rel Ret Time | Sep. Code | Width 1/2 (sec) | Peak Area (counts) | Peak Height (counts) |
|---------|-----------------|----------------|--------------|-----------|-----------------|--------------------|----------------------|
| 1       | 0.6358          | 2.363          | 0.00         | BB        | 7.7             | 954003             | 110507               |
| 2       | 0.0148          | 4.664          | 0.00         | BV        | 13.1            | 22184              | 1949                 |
| 3       | 0.1708          | 5.163          | 0.00         | VV        | 12.3            | 256367             | 17475                |
| 4       | 0.3034          | 5.896          | 0.00         | VV        | 11.0            | 455201             | 39859                |
| 5       | 98.7764         | 6.349          | 0.00         | VB        | 19.5            | 148220960          | 7168003              |
| 6       | 0.0557          | 9.936          | 0.00         | BB        | 17.8            | 83517              | 4148                 |
| 7       | 0.0139          | 13.051         | 0.00         | BB        | 15.2            | 20904              | 1578                 |
| 8       | 0.0292          | 15.771         | 0.00         | BB        | 15.5            | 43863              | 2838                 |
|         | <b>100.0000</b> |                |              |           |                 | <b>150057008</b>   | <b>7346357</b>       |

**Method Notes**

XTerra MS C-18, 5um, 3.9x150 mm column  
30-50% Acetonitrile with 0.1% TFA- Water with 0.1% TFA  
1 ml/min

Compound

4a

Detection

254 nm

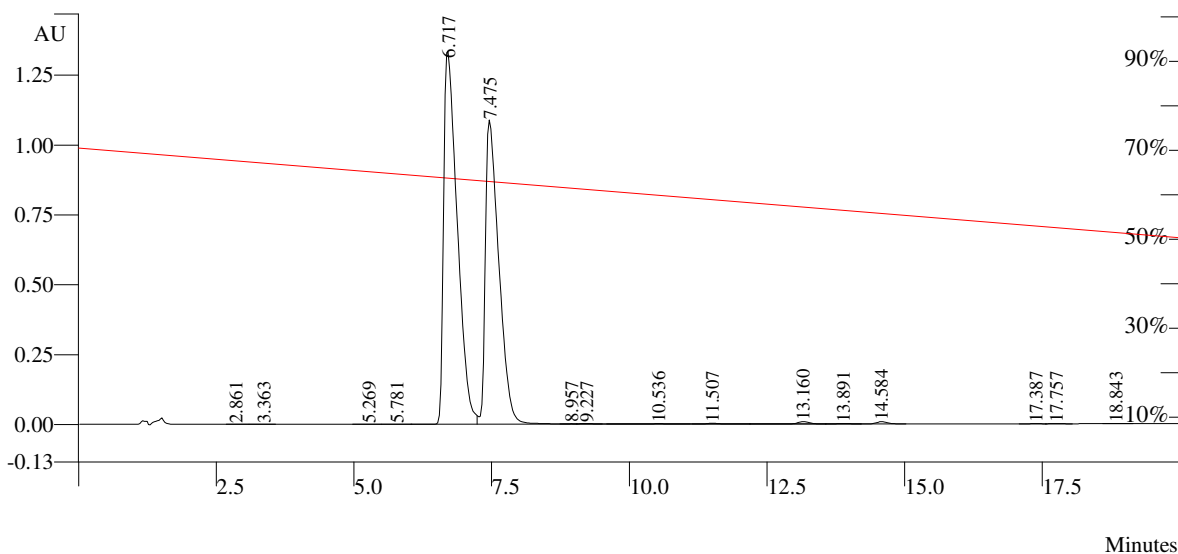

Minutes

| Peak No | Result (%)     | Ret Time (min) | Rel Ret Time | Sep. Code | Width 1/2 (sec) | Peak Area (counts) | Peak Height (counts) |
|---------|----------------|----------------|--------------|-----------|-----------------|--------------------|----------------------|
| 1       | 0.0056         | 2.861          | 0.00         | BP        | 12.2            | 12097              | 1073                 |
| 2       | 0.0051         | 3.363          | 0.00         | PB        | 0.0             | 10995              | 960                  |
| 3       | 0.0075         | 5.269          | 0.00         | BP        | 11.5            | 16181              | 1478                 |
| 4       | 0.0096         | 5.781          | 0.00         | PV        | 16.3            | 20615              | 1564                 |
| 5       | 54.7631        | 6.717          | 0.00         | VV        | 16.2            | 117690464          | 6832873              |
| 6       | 44.3492        | 7.475          | 0.00         | VP        | 15.8            | 95310032           | 5574384              |
| 7       | 0.0149         | 8.957          | 0.00         | TF        | 0.0             | 31921              | 3074                 |
| 8       | 0.0545         | 9.227          | 0.00         | TF        | 0.0             | 117062             | 9107                 |
| 9       | 0.0464         | 10.536         | 0.00         | TS        | 0.0             | 99811              | 7874                 |
| 10      | 0.0921         | 11.507         | 0.00         | TF        | 0.0             | 198002             | 13038                |
| 11      | 0.2922         | 13.160         | 0.00         | TF        | 0.0             | 628011             | 43463                |
| 12      | 0.0585         | 13.891         | 0.00         | TF        | 0.0             | 125764             | 8650                 |
| 13      | 0.2543         | 14.584         | 0.00         | PB        | 0.0             | 546470             | 41334                |
| 14      | 0.0174         | 17.387         | 0.00         | BV        | 14.9            | 37482              | 2861                 |
| 15      | 0.0181         | 17.757         | 0.00         | VB        | 20.2            | 38895              | 2557                 |
| 16      | 0.0114         | 18.843         | 0.00         | BB        | 14.1            | 24489              | 1725                 |
|         | <b>99.9999</b> |                |              |           |                 | <b>214908288</b>   | <b>12546015</b>      |

**Method Notes**

XTerra MS C-18, 5um, 3.9x150 mm column  
30-60% Acetonitrile with 0.1% TFA- Water with 0.1% TFA  
1 ml/min

Compound

**4b**

Detection

254 nm

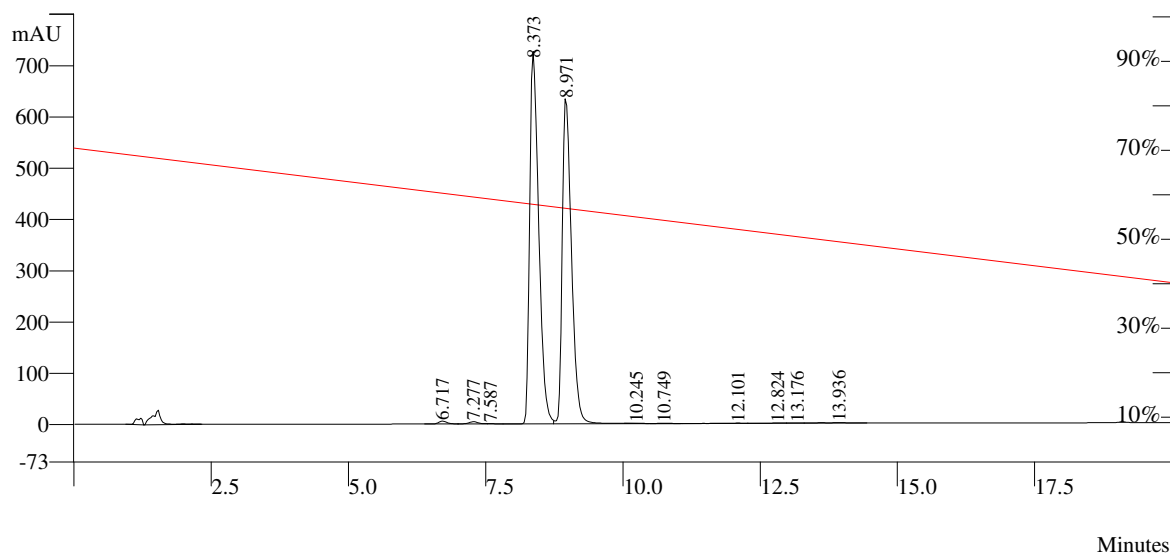

| Peak No | Result (%)      | Ret Time (min) | Rel Ret Time | Sep. Code | Width 1/2 (sec) | Peak Area (counts) | Peak Height (counts) |
|---------|-----------------|----------------|--------------|-----------|-----------------|--------------------|----------------------|
| 1       | 0.3688          | 6.717          | 0.00         | BV        | 9.6             | 300588             | 29082                |
| 2       | 0.3142          | 7.277          | 0.00         | VV        | 9.8             | 256043             | 23141                |
| 3       | 0.0205          | 7.587          | 0.00         | VP        | 9.6             | 16745              | 1910                 |
| 4       | 52.1697         | 8.373          | 0.00         | PV        | 10.7            | 42515264           | 3721851              |
| 5       | 46.7194         | 8.971          | 0.00         | VP        | 10.9            | 38073636           | 3246045              |
| 6       | 0.0369          | 10.245         | 0.00         | TS        | 0.0             | 30058              | 2713                 |
| 7       | 0.0325          | 10.749         | 0.00         | TS        | 0.0             | 26507              | 2044                 |
| 8       | 0.0254          | 12.101         | 0.00         | PV        | 0.0             | 20687              | 2759                 |
| 9       | 0.0627          | 12.824         | 0.00         | VV        | 0.0             | 51095              | 3235                 |
| 10      | 0.0567          | 13.176         | 0.00         | VV        | 0.0             | 46204              | 3588                 |
| 11      | 0.1932          | 13.936         | 0.00         | VB        | 0.0             | 157426             | 3583                 |
|         | <b>100.0000</b> |                |              |           |                 | <b>81494240</b>    | <b>7039951</b>       |

**Method Notes**

XTerra MS C-18, 5um, 3.9x150 mm column  
30-60% Acetonitrile with 0.1% TFA- Water with 0.1% TFA  
1 ml/min

Compound  
Detection

4c  
254 nm

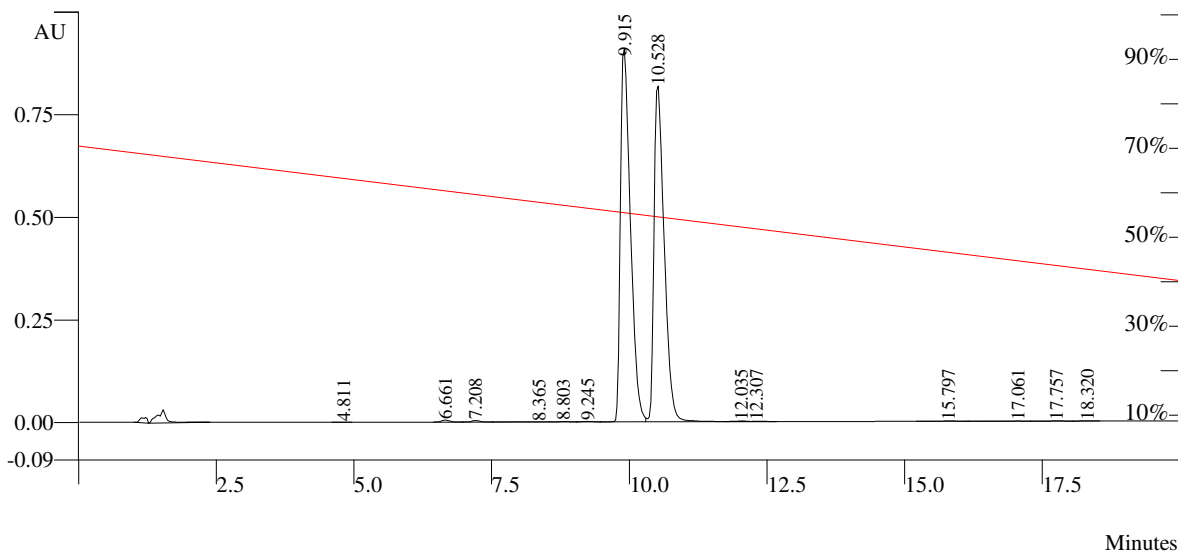

| Peak No         | Result (%) | Ret Time (min) | Rel Ret Time | Sep. Code | Width 1/2 (sec) | Peak Area (counts) | Peak Height (counts) |
|-----------------|------------|----------------|--------------|-----------|-----------------|--------------------|----------------------|
| 1               | 0.0057     | 4.811          | 0.00         | BB        | 0.0             | 6507               | 687                  |
| 2               | 0.2204     | 6.661          | 0.00         | BV        | 9.3             | 250811             | 24745                |
| 3               | 0.1699     | 7.208          | 0.00         | VV        | 9.4             | 193299             | 19124                |
| 4               | 0.0137     | 8.365          | 0.00         | VP        | 19.5            | 15570              | 1366                 |
| 5               | 0.0446     | 8.803          | 0.00         | PV        | 17.8            | 50786              | 4420                 |
| 6               | 0.0488     | 9.245          | 0.00         | VV        | 13.8            | 55495              | 5343                 |
| 7               | 51.6434    | 9.915          | 0.00         | VV        | 11.8            | 58761424           | 4650629              |
| 8               | 47.5653    | 10.528         | 0.00         | VB        | 11.8            | 54121300           | 4193585              |
| 9               | 0.0781     | 12.035         | 0.00         | TF        | 0.0             | 88863              | 7387                 |
| 10              | 0.0245     | 12.307         | 0.00         | TF        | 0.0             | 27849              | 1615                 |
| 11              | 0.0857     | 15.797         | 0.00         | BV        | 15.0            | 97559              | 5443                 |
| 12              | 0.0544     | 17.061         | 0.00         | VV        | 0.0             | 61851              | 1675                 |
| 13              | 0.0299     | 17.757         | 0.00         | VV        | 0.0             | 34063              | 1682                 |
| 14              | 0.0156     | 18.320         | 0.00         | VB        | 0.0             | 17763              | 1320                 |
| <b>100.0000</b> |            |                |              |           |                 | <b>113783136</b>   | <b>8919021</b>       |

**Method Notes**

XTerra MS C-18, 5um, 3.9x150 mm column  
30-60% Acetonitrile with 0.1% TFA- Water with 0.1% TFA  
1 ml/min

Compound

**4d**

Detection

254 nm

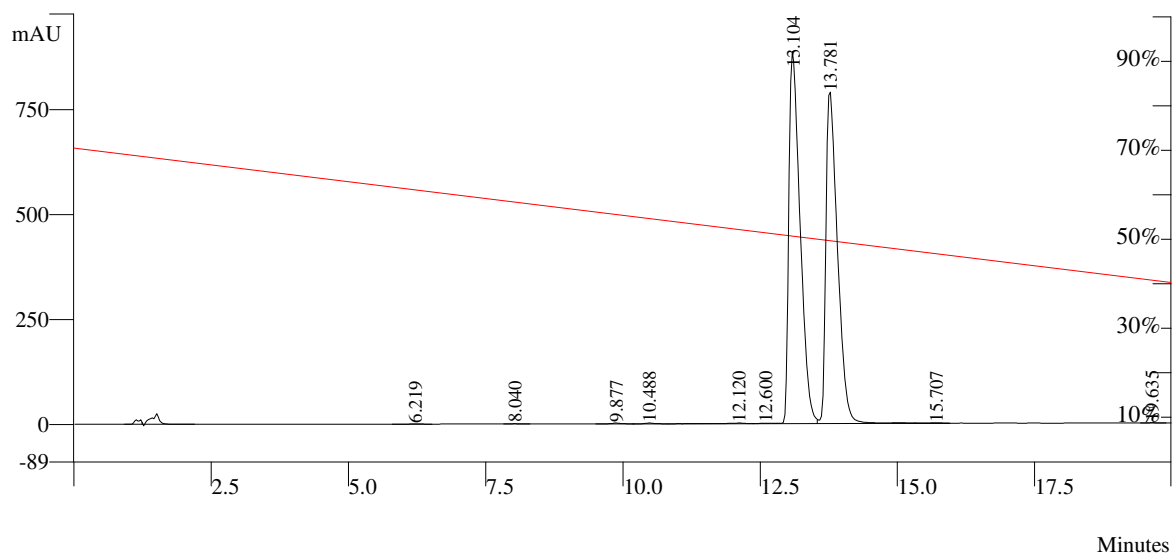

| Peak No | Result (%)      | Ret Time (min) | Rel Ret Time | Sep. Code | Width 1/2 (sec) | Peak Area (counts) | Peak Height (counts) |
|---------|-----------------|----------------|--------------|-----------|-----------------|--------------------|----------------------|
| 1       | 0.0212          | 6.219          | 0.00         | BB        | 14.7            | 26374              | 1995                 |
| 2       | 0.0266          | 8.040          | 0.00         | BB        | 10.9            | 33030              | 3052                 |
| 3       | 0.0844          | 9.877          | 0.00         | BV        | 10.2            | 104947             | 9515                 |
| 4       | 0.0746          | 10.488         | 0.00         | VP        | 10.4            | 92777              | 8790                 |
| 5       | 0.0847          | 12.120         | 0.00         | PV        | 23.4            | 105332             | 6883                 |
| 6       | 0.0583          | 12.600         | 0.00         | VV        | 17.6            | 72556              | 5488                 |
| 7       | 51.8248         | 13.104         | 0.00         | VV        | 13.3            | 64454060           | 4540041              |
| 8       | 47.7843         | 13.781         | 0.00         | VB        | 13.6            | 59428928           | 4040021              |
| 9       | 0.0184          | 15.707         | 0.00         | TS        | 0.0             | 22831              | 3044                 |
| 10      | 0.0228          | 19.635         | 0.00         | BB        | 11.2            | 28295              | 2442                 |
|         | <b>100.0001</b> |                |              |           |                 | <b>124369128</b>   | <b>8621271</b>       |

**Method Notes**

XTerra MS C-18, 5um, 3.9x150 mm column  
40-60% Acetonitrile with 0.1% TFA- Water with 0.1% TFA  
1 ml/min

Compound

4e

Detection

254 nm

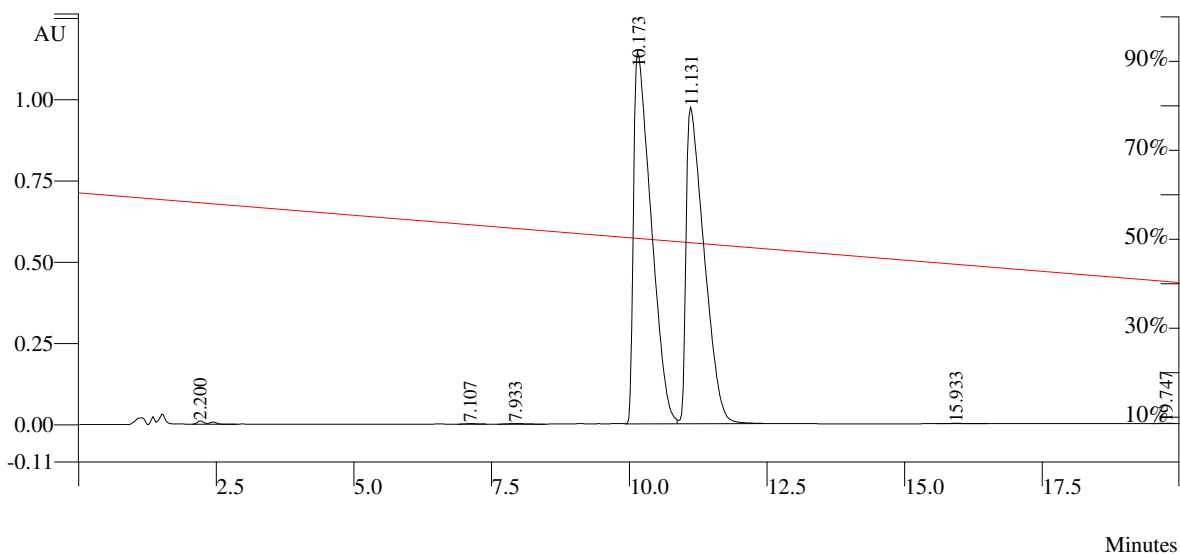

| Peak No | Result (%)      | Ret Time (min) | Rel Ret Time | Sep. Code | Width 1/2 (sec) | Peak Area (counts) | Peak Height (counts) |
|---------|-----------------|----------------|--------------|-----------|-----------------|--------------------|----------------------|
| 1       | 0.2816          | 2.200          | 0.00         | BB        | 7.5             | 690213             | 50673                |
| 2       | 0.0454          | 7.107          | 0.00         | BB        | 13.6            | 111358             | 7961                 |
| 3       | 0.0765          | 7.933          | 0.00         | BB        | 21.2            | 187414             | 8911                 |
| 4       | 53.0973         | 10.173         | 0.00         | BV        | 21.1            | 130160784          | 5872025              |
| 5       | 46.4307         | 11.131         | 0.00         | VB        | 21.6            | 113818368          | 4995556              |
| 6       | 0.0529          | 15.933         | 0.00         | BB        | 21.9            | 129601             | 5538                 |
| 7       | 0.0157          | 19.747         | 0.00         | BB        | 15.5            | 38433              | 2781                 |
|         | <b>100.0001</b> |                |              |           |                 | <b>245136160</b>   | <b>10943445</b>      |



**Method Notes**

XTerra MS C-18, 5um, 3.9x150 mm column  
30-60% Acetonitrile with 0.1% TFA- Water with 0.1% TFA  
1 ml/min

Compound **4f**  
Detection 254 nm

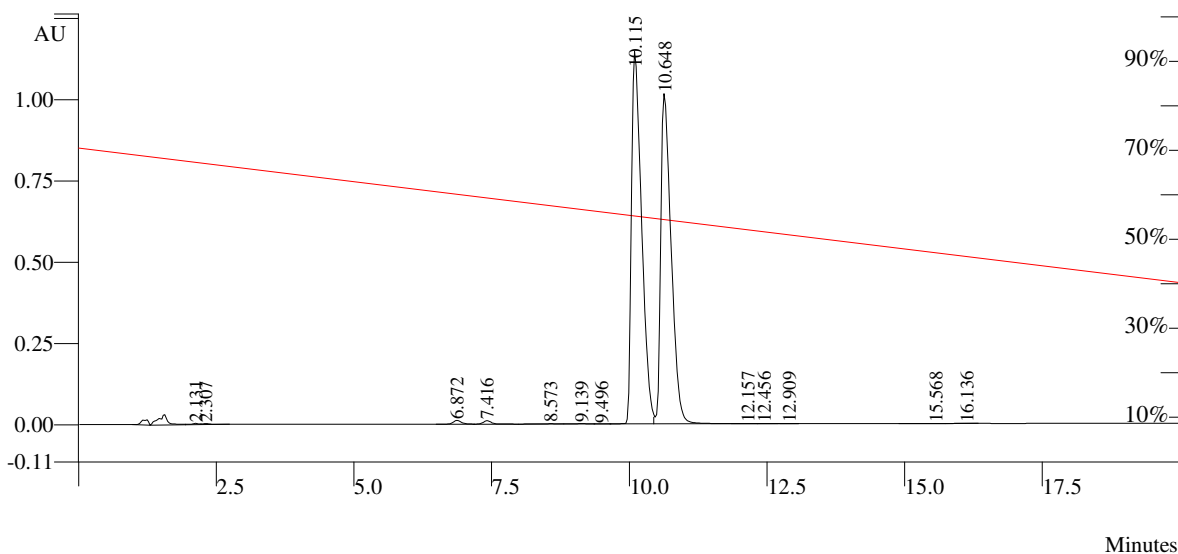

| Peak No | Result (%)      | Ret Time (min) | Rel Ret Time | Sep. Code | Width 1/2 (sec) | Peak Area (counts) | Peak Height (counts) |
|---------|-----------------|----------------|--------------|-----------|-----------------|--------------------|----------------------|
| 1       | 0.1448          | 2.131          | 0.00         | VV        | 7.7             | 210849             | 20457                |
| 2       | 0.1307          | 2.307          | 0.00         | VB        | 9.0             | 190351             | 17444                |
| 3       | 0.3995          | 6.872          | 0.00         | BV        | 9.1             | 581566             | 58628                |
| 4       | 0.3667          | 7.416          | 0.00         | VP        | 9.3             | 533835             | 52671                |
| 5       | 0.0411          | 8.573          | 0.00         | PP        | 11.5            | 59784              | 5965                 |
| 6       | 0.0524          | 9.139          | 0.00         | PV        | 13.9            | 76301              | 6667                 |
| 7       | 0.0163          | 9.496          | 0.00         | VV        | 0.0             | 23717              | 2264                 |
| 8       | 51.6030         | 10.115         | 0.00         | VV        | 12.0            | 75129176           | 5876753              |
| 9       | 47.1527         | 10.648         | 0.00         | VB        | 12.2            | 68650064           | 5206575              |
| 10      | 0.0345          | 12.157         | 0.00         | TF        | 0.0             | 50256              | 3734                 |
| 11      | 0.0184          | 12.456         | 0.00         | TF        | 0.0             | 26741              | 2308                 |
| 12      | 0.0044          | 12.909         | 0.00         | TS        | 0.0             | 6442               | 696                  |
| 13      | 0.0168          | 15.568         | 0.00         | BP        | 18.9            | 24475              | 1167                 |
| 14      | 0.0187          | 16.136         | 0.00         | PB        | 0.0             | 27264              | 1230                 |
|         | <b>100.0000</b> |                |              |           |                 | <b>145590832</b>   | <b>11256559</b>      |

**Method Notes**

XTerra MS C-18, 5um, 3.9x150 mm column  
30-60% Acetonitrile with 0.1% TFA- Water with 0.1% TFA  
1 ml/min

Compound **4g**  
Detection **254 nm**

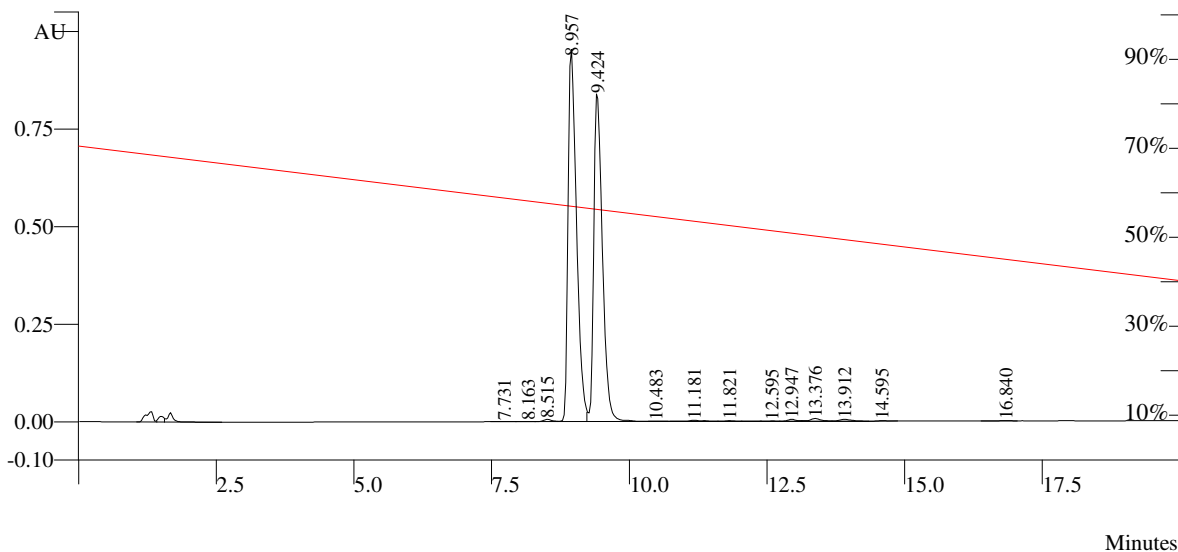

| Peak No         | Result (%) | Ret Time (min) | Rel Ret Time | Sep. Code | Width 1/2 (sec) | Peak Area (counts) | Peak Height (counts) |
|-----------------|------------|----------------|--------------|-----------|-----------------|--------------------|----------------------|
| 1               | 0.0296     | 7.731          | 0.00         | BV        | 12.0            | 30186              | 2532                 |
| 2               | 0.0352     | 8.163          | 0.00         | VV        | 13.1            | 35964              | 3076                 |
| 3               | 0.3168     | 8.515          | 0.00         | VV        | 10.7            | 323383             | 28299                |
| 4               | 51.4618    | 8.957          | 0.00         | VV        | 10.1            | 52537620           | 4887166              |
| 5               | 46.5940    | 9.424          | 0.00         | VP        | 9.9             | 47568104           | 4301179              |
| 6               | 0.0213     | 10.483         | 0.00         | TS        | 0.0             | 21796              | 2294                 |
| 7               | 0.2199     | 11.181         | 0.00         | TF        | 0.0             | 224545             | 14146                |
| 8               | 0.0689     | 11.821         | 0.00         | TF        | 0.0             | 70293              | 7722                 |
| 9               | 0.0505     | 12.595         | 0.00         | TF        | 0.0             | 51545              | 2507                 |
| 10              | 0.2583     | 12.947         | 0.00         | TF        | 0.0             | 263718             | 25849                |
| 11              | 0.4733     | 13.376         | 0.00         | TF        | 0.0             | 483228             | 36203                |
| 12              | 0.3663     | 13.912         | 0.00         | TF        | 0.0             | 373962             | 25940                |
| 13              | 0.0764     | 14.595         | 0.00         | PB        | 0.0             | 77965              | 7650                 |
| 14              | 0.0277     | 16.840         | 0.00         | BB        | 0.0             | 28291              | 1485                 |
| <b>100.0000</b> |            |                |              |           |                 | <b>102090600</b>   | <b>9346048</b>       |

**Method Notes**

XTerra MS C-18, 5um, 3.9x150 mm column  
30-60% Acetonitrile with 0.1% TFA- Water with 0.1% TFA  
1 ml/min

Compound

**4h**

Detection

254 nm

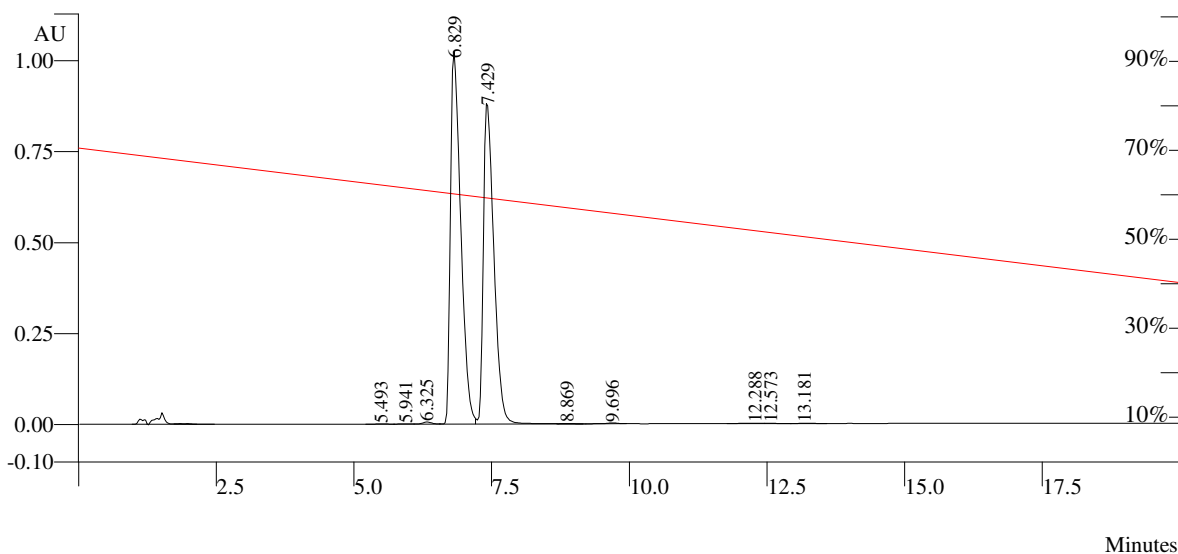

| Peak No | Result (%)      | Ret Time (min) | Rel Ret Time | Sep. Code | Width 1/2 (sec) | Peak Area (counts) | Peak Height (counts) |
|---------|-----------------|----------------|--------------|-----------|-----------------|--------------------|----------------------|
| 1       | 0.0305          | 5.493          | 0.00         | BV        | 11.5            | 39459              | 3291                 |
| 2       | 0.0284          | 5.941          | 0.00         | VV        | 13.3            | 36801              | 3326                 |
| 3       | 0.2453          | 6.325          | 0.00         | VV        | 10.1            | 317349             | 29444                |
| 4       | 52.6871         | 6.829          | 0.00         | VV        | 12.2            | 68157272           | 5246506              |
| 5       | 46.5998         | 7.429          | 0.00         | VP        | 12.5            | 60282552           | 4480238              |
| 6       | 0.0257          | 8.869          | 0.00         | TS        | 0.0             | 33258              | 3428                 |
| 7       | 0.1374          | 9.696          | 0.00         | PB        | 0.0             | 177749             | 12489                |
| 8       | 0.1278          | 12.288         | 0.00         | BV        | 37.8            | 165279             | 6665                 |
| 9       | 0.0569          | 12.573         | 0.00         | VV        | 40.5            | 73569              | 5038                 |
| 10      | 0.0611          | 13.181         | 0.00         | VB        | 22.2            | 79067              | 4343                 |
|         | <b>100.0000</b> |                |              |           |                 | <b>129362352</b>   | <b>9794768</b>       |

**Method Notes**

XTerra MS C-18, 5um, 3.9x150 mm column  
30-60% Acetonitrile with 0.1% TFA- Water with 0.1% TFA  
1 ml/min

Compound  
Detection

4i  
254 nm

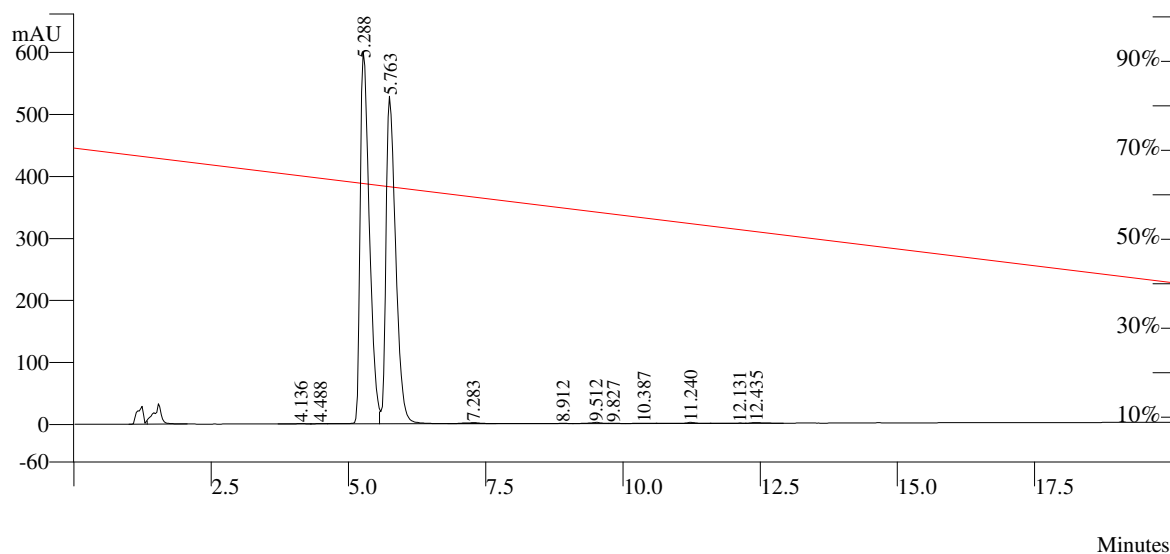

| Peak No | Result (%)     | Ret Time (min) | Rel Ret Time | Sep. Code | Width 1/2 (sec) | Peak Area (counts) | Peak Height (counts) |
|---------|----------------|----------------|--------------|-----------|-----------------|--------------------|----------------------|
| 1       | 0.0585         | 4.136          | 0.00         | BV        | 13.1            | 40806              | 2914                 |
| 2       | 0.0493         | 4.488          | 0.00         | VV        | 13.8            | 34370              | 2711                 |
| 3       | 51.0487        | 5.288          | 0.00         | VV        | 10.9            | 35620840           | 3076206              |
| 4       | 47.9881        | 5.763          | 0.00         | VP        | 11.4            | 33485210           | 2706122              |
| 5       | 0.2469         | 7.283          | 0.00         | TS        | 0.0             | 172315             | 9025                 |
| 6       | 0.0548         | 8.912          | 0.00         | PV        | 0.0             | 38242              | 2497                 |
| 7       | 0.2011         | 9.512          | 0.00         | VV        | 0.0             | 140343             | 9221                 |
| 8       | 0.0290         | 9.827          | 0.00         | VP        | 0.0             | 20269              | 2074                 |
| 9       | 0.0414         | 10.387         | 0.00         | PV        | 0.0             | 28880              | 2072                 |
| 10      | 0.1378         | 11.240         | 0.00         | VV        | 0.0             | 96163              | 8028                 |
| 11      | 0.0236         | 12.131         | 0.00         | VV        | 0.0             | 16436              | 1459                 |
| 12      | 0.1207         | 12.435         | 0.00         | VB        | 0.0             | 84228              | 6069                 |
|         | <b>99.9999</b> |                |              |           |                 | <b>69778096</b>    | <b>5828398</b>       |

**Method Notes**

XTerra MS C-18, 5um, 3.9x150 mm column  
30-50% Acetonitrile with 0.1% TFA- Water with 0.1% TFA  
1 ml/min

Compound  
Detection

**5a**  
254 nm

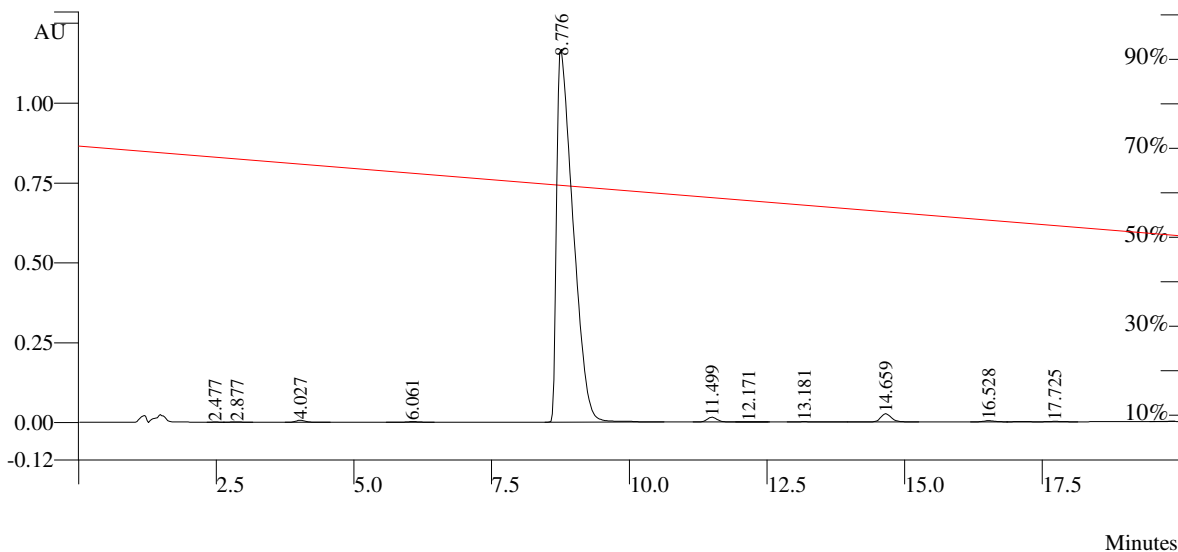

| Peak No | Result (%)     | Ret Time (min) | Rel Ret Time | Sep. Code | Width 1/2 (sec) | Peak Area (counts) | Peak Height (counts) |
|---------|----------------|----------------|--------------|-----------|-----------------|--------------------|----------------------|
| 1       | 0.0324         | 2.477          | 0.00         | BV        | 8.0             | 41295              | 4736                 |
| 2       | 0.0708         | 2.877          | 0.00         | VB        | 12.0            | 90276              | 6638                 |
| 3       | 0.3228         | 4.027          | 0.00         | BB        | 11.5            | 411635             | 32450                |
| 4       | 0.1149         | 6.061          | 0.00         | BB        | 12.0            | 146513             | 11084                |
| 5       | 96.9702        | 8.776          | 0.00         | BB        | 19.4            | 123637368          | 5979178              |
| 6       | 0.7432         | 11.499         | 0.00         | BB        | 11.4            | 947639             | 75634                |
| 7       | 0.0261         | 12.171         | 0.00         | TS        | 0.0             | 33246              | 2758                 |
| 8       | 0.0492         | 13.181         | 0.00         | BP        | 15.2            | 62749              | 3675                 |
| 9       | 1.3657         | 14.659         | 0.00         | PB        | 12.2            | 1741210            | 131196               |
| 10      | 0.2005         | 16.528         | 0.00         | BV        | 13.0            | 255669             | 18602                |
| 11      | 0.1041         | 17.725         | 0.00         | VB        | 14.1            | 132743             | 6874                 |
|         | <b>99.9999</b> |                |              |           |                 | <b>127500352</b>   | <b>6272825</b>       |

**Method Notes**

XTerra MS C-18, 5um, 3.9x150 mm column  
30-60% Acetonitrile with 0.1% TFA- Water with 0.1% TFA  
1 ml/min

Compound

**5b**

Detection

254 nm

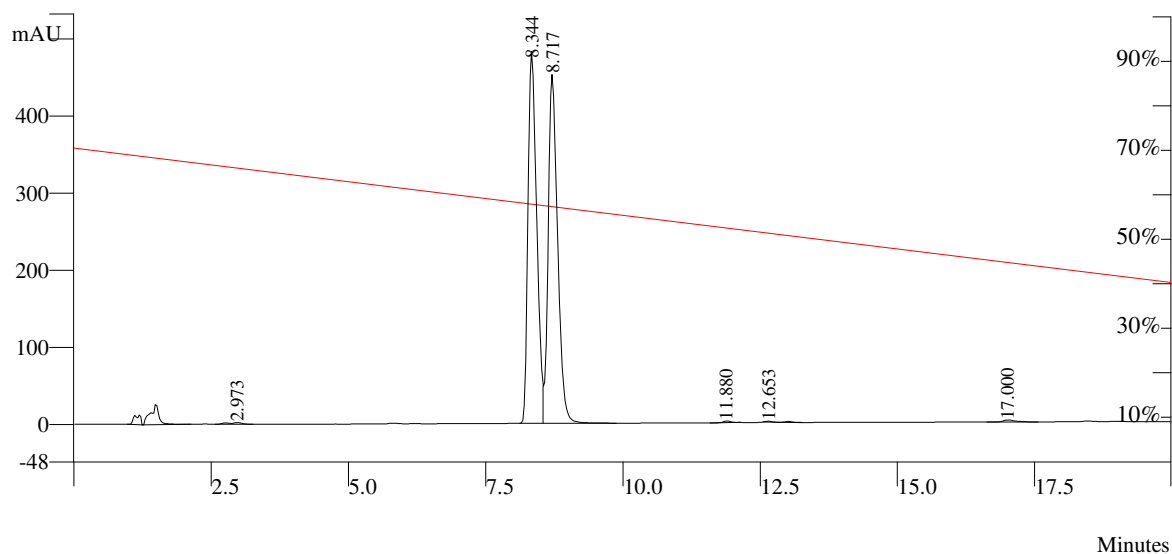

| Peak No | Result (%)      | Ret Time (min) | Rel Ret Time | Sep. Code | Width 1/2 (sec) | Peak Area (counts) | Peak Height (counts) |
|---------|-----------------|----------------|--------------|-----------|-----------------|--------------------|----------------------|
| 1       | 0.3787          | 2.973          | 0.00         | BB        | 10.8            | 209751             | 11615                |
| 2       | 48.7562         | 8.344          | 0.00         | BV        | 10.4            | 27005478           | 2471731              |
| 3       | 50.1153         | 8.717          | 0.00         | VB        | 10.9            | 27758250           | 2317353              |
| 4       | 0.1851          | 11.880         | 0.00         | BB        | 9.9             | 102531             | 11084                |
| 5       | 0.1805          | 12.653         | 0.00         | BB        | 7.5             | 99989              | 6473                 |
| 6       | 0.3842          | 17.000         | 0.00         | BB        | 13.9            | 212826             | 13554                |
|         | <b>100.0000</b> |                |              |           |                 | <b>55388824</b>    | <b>4831810</b>       |

**Method Notes**

XTerra MS C-18, 5um, 3.9x150 mm column  
30-60% Acetonitrile with 0.1% TFA- Water with 0.1% TFA  
1 ml/min

Compound  
Detection

5c  
254 nm

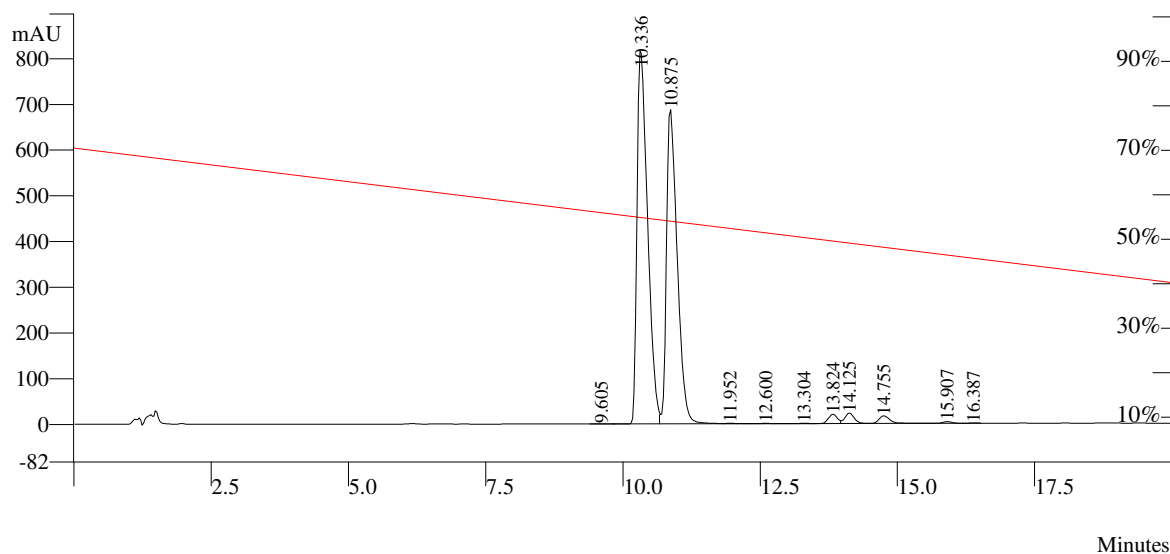

| Peak No | Result (%)      | Ret Time (min) | Rel Ret Time | Sep. Code | Width 1/2 (sec) | Peak Area (counts) | Peak Height (counts) |
|---------|-----------------|----------------|--------------|-----------|-----------------|--------------------|----------------------|
| 1       | 0.0159          | 9.605          | 0.00         | BV        | 12.5            | 17229              | 1505                 |
| 2       | 51.8005         | 10.336         | 0.00         | VV        | 12.8            | 56072080           | 4150031              |
| 3       | 44.4002         | 10.875         | 0.00         | VP        | 12.6            | 48061492           | 3518112              |
| 4       | 0.0210          | 11.952         | 0.00         | TS        | 0.0             | 22713              | 2482                 |
| 5       | 0.0297          | 12.600         | 0.00         | TS        | 0.0             | 32184              | 2933                 |
| 6       | 0.0329          | 13.304         | 0.00         | TS        | 0.0             | 35611              | 3224                 |
| 7       | 1.0876          | 13.824         | 0.00         | PV        | 0.0             | 1177237            | 104383               |
| 8       | 1.2926          | 14.125         | 0.00         | VV        | 0.0             | 1399164            | 117189               |
| 9       | 1.0863          | 14.755         | 0.00         | VP        | 0.0             | 1175920            | 85950                |
| 10      | 0.1951          | 15.907         | 0.00         | PP        | 0.0             | 211218             | 19738                |
| 11      | 0.0382          | 16.387         | 0.00         | PB        | 0.0             | 41403              | 4307                 |
|         | <b>100.0000</b> |                |              |           |                 | <b>108246248</b>   | <b>8009854</b>       |

**Method Notes**

XTerra MS C-18, 5um, 3.9x150 mm column  
30-60% Acetonitrile with 0.1% TFA- Water with 0.1% TFA  
1 ml/min

Compound  
Detection

**5d**  
254 nm

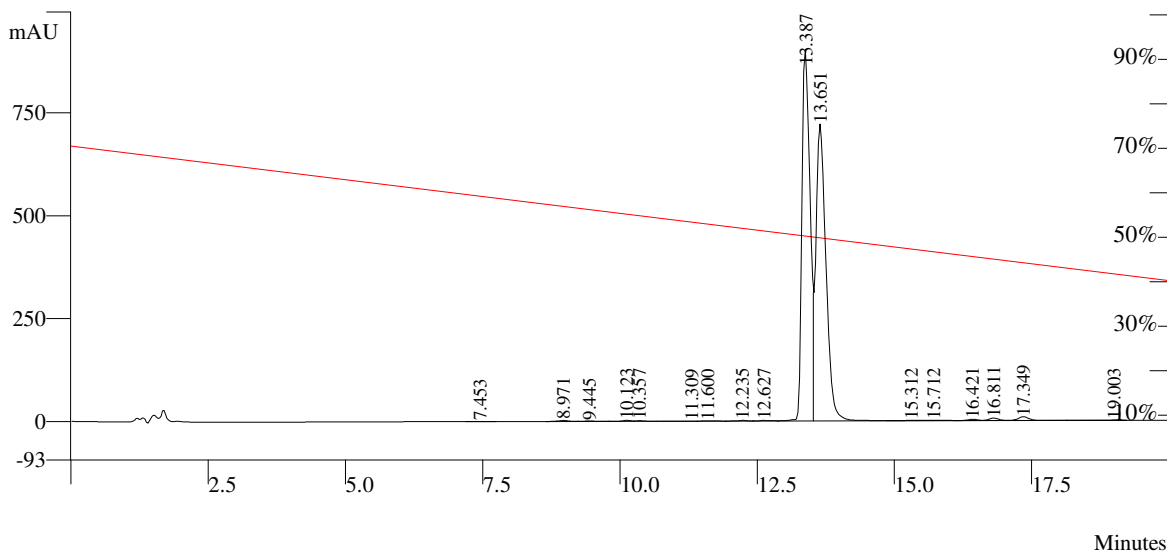

Minutes

| Peak No | Result (%)     | Ret Time (min) | Rel Ret Time | Sep. Code | Width 1/2 (sec) | Peak Area (counts) | Peak Height (counts) |
|---------|----------------|----------------|--------------|-----------|-----------------|--------------------|----------------------|
| 1       | 0.0198         | 7.453          | 0.00         | BB        | 0.0             | 19234              | 1242                 |
| 2       | 0.1619         | 8.971          | 0.00         | BV        | 12.0            | 157615             | 12043                |
| 3       | 0.0753         | 9.445          | 0.00         | VV        | 15.5            | 73263              | 4822                 |
| 4       | 0.1397         | 10.123         | 0.00         | VV        | 9.9             | 135994             | 14103                |
| 5       | 0.0824         | 10.357         | 0.00         | VP        | 12.5            | 80153              | 8335                 |
| 6       | 0.0081         | 11.309         | 0.00         | PV        | 0.0             | 7837               | 1010                 |
| 7       | 0.0541         | 11.600         | 0.00         | VV        | 15.4            | 52658              | 4652                 |
| 8       | 0.0887         | 12.235         | 0.00         | VV        | 12.8            | 86370              | 8796                 |
| 9       | 0.1271         | 12.627         | 0.00         | VV        | 16.0            | 123734             | 8119                 |
| 10      | 49.1666        | 13.387         | 0.00         | VV        | 10.6            | 47851952           | 4621532              |
| 11      | 48.7128        | 13.651         | 0.00         | VB        | 12.2            | 47410328           | 3693162              |
| 12      | 0.0538         | 15.312         | 0.00         | TF        | 0.0             | 52358              | 4769                 |
| 13      | 0.0553         | 15.712         | 0.00         | TF        | 0.0             | 53859              | 3389                 |
| 14      | 0.1879         | 16.421         | 0.00         | TF        | 0.0             | 182894             | 15291                |
| 15      | 0.3694         | 16.811         | 0.00         | TF        | 0.0             | 359477             | 30136                |
| 16      | 0.6563         | 17.349         | 0.00         | TF        | 0.0             | 638759             | 46678                |
| 17      | 0.0407         | 19.003         | 0.00         | TF        | 0.0             | 39636              | 3796                 |
|         | <b>99.9999</b> |                |              |           |                 | <b>97326128</b>    | <b>8481875</b>       |



**Method Notes**

XTerra MS C-18, 5um, 3.9x150 mm column  
30-60% Acetonitrile with 0.1% TFA- Water with 0.1% TFA  
1 ml/min

Compound  
Detection

5e  
254 nm

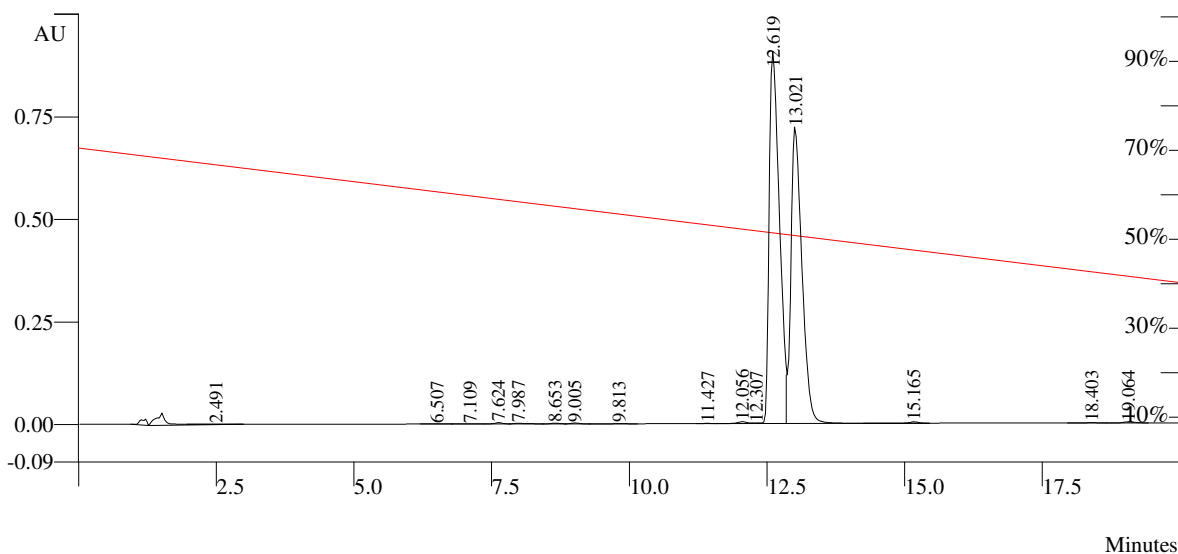

| Peak No | Result (%)      | Ret Time (min) | Rel Ret Time | Sep. Code | Width 1/2 (sec) | Peak Area (counts) | Peak Height (counts) |
|---------|-----------------|----------------|--------------|-----------|-----------------|--------------------|----------------------|
| 1       | 0.0268          | 2.491          | 0.00         | TS        | 0.0             | 30274              | 2185                 |
| 2       | 0.0328          | 6.507          | 0.00         | BV        | 12.3            | 36998              | 2985                 |
| 3       | 0.0232          | 7.109          | 0.00         | VP        | 23.4            | 26105              | 1407                 |
| 4       | 0.1446          | 7.624          | 0.00         | PV        | 9.9             | 163103             | 16229                |
| 5       | 0.1226          | 7.987          | 0.00         | VV        | 10.9            | 138259             | 10338                |
| 6       | 0.0824          | 8.653          | 0.00         | VV        | 11.7            | 92870              | 8696                 |
| 7       | 0.0963          | 9.005          | 0.00         | VV        | 11.4            | 108626             | 10332                |
| 8       | 0.0315          | 9.813          | 0.00         | VB        | 0.0             | 35486              | 2002                 |
| 9       | 0.0276          | 11.427         | 0.00         | BV        | 11.8            | 31083              | 2633                 |
| 10      | 0.2611          | 12.056         | 0.00         | VV        | 10.6            | 294379             | 23577                |
| 11      | 0.0496          | 12.307         | 0.00         | VV        | 10.6            | 55978              | 8717                 |
| 12      | 52.8397         | 12.619         | 0.00         | VV        | 12.5            | 59583864           | 4648046              |
| 13      | 45.8883         | 13.021         | 0.00         | VB        | 12.6            | 51745264           | 3702878              |
| 14      | 0.1831          | 15.165         | 0.00         | TS        | 0.0             | 206496             | 17743                |
| 15      | 0.0410          | 18.403         | 0.00         | BP        | 13.6            | 46235              | 2570                 |
| 16      | 0.1494          | 19.064         | 0.00         | PB        | 13.9            | 168522             | 11951                |
|         | <b>100.0000</b> |                |              |           |                 | <b>112763536</b>   | <b>8472289</b>       |

**Method Notes**

XTerra C18, 3.9 mm x 150 mm  
60% Acetonitrile - 40% Water both with 0.1% TFA  
1 ml/min

Compound **6a**  
Detection 254 nm

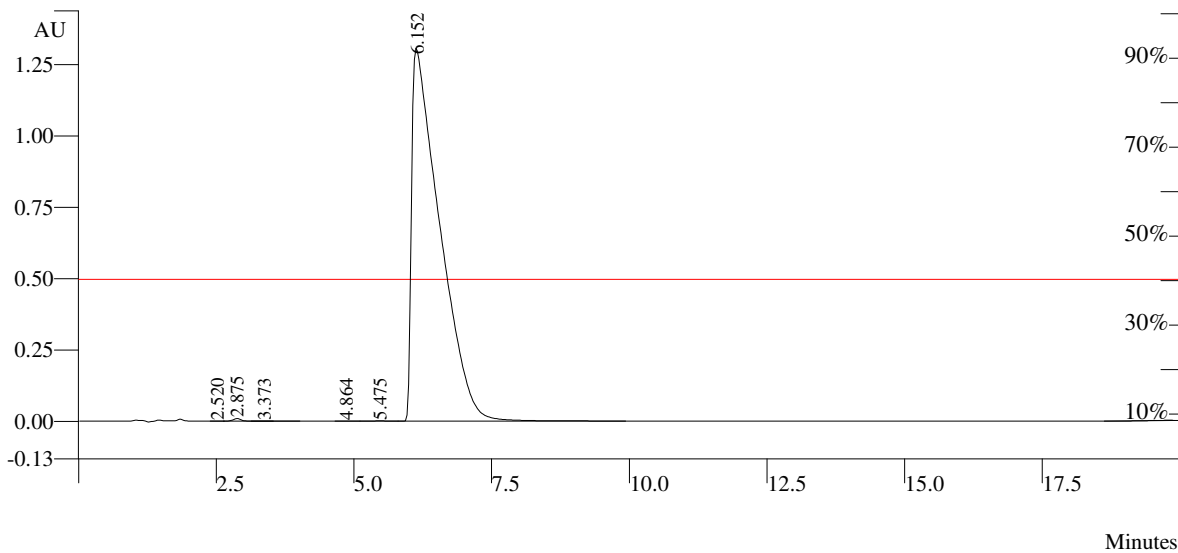

| Peak No | Result (%)      | Ret Time (min) | Rel Ret Time | Sep. Code | Width 1/2 (sec) | Peak Area (counts) | Peak Height (counts) |
|---------|-----------------|----------------|--------------|-----------|-----------------|--------------------|----------------------|
| 1       | 0.0114          | 2.520          | 0.00         | BV        | 7.8             | 27104              | 3335                 |
| 2       | 0.2227          | 2.875          | 0.00         | VB        | 8.6             | 529750             | 49136                |
| 3       | 0.0106          | 3.373          | 0.00         | TS        | 0.0             | 25142              | 2053                 |
| 4       | 0.0123          | 4.864          | 0.00         | BP        | 11.5            | 29248              | 2365                 |
| 5       | 0.0376          | 5.475          | 0.00         | PP        | 12.6            | 89461              | 6419                 |
| 6       | 99.7054         | 6.152          | 0.00         | PB        | 33.0            | 237131952          | 6645061              |
|         | <b>100.0000</b> |                |              |           |                 | <b>237832656</b>   | <b>6708369</b>       |

**Method Notes**

XTerra MS C-18, 5um, 3.9x150 mm column  
30-60% Acetonitrile with 0.1% TFA- Water with 0.1% TFA  
1 ml/min

Compound

**6b**

Detection

254 nm

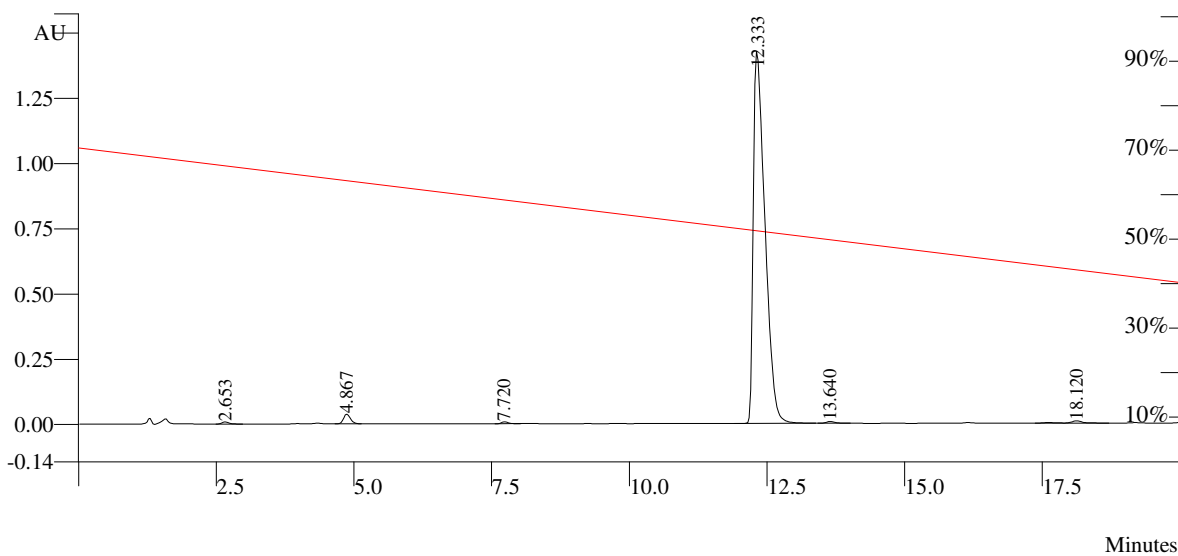

| Peak No         | Result (%) | Ret Time (min) | Rel Ret Time | Sep. Code | Width 1/2 (sec) | Peak Area (counts) | Peak Height (counts) |
|-----------------|------------|----------------|--------------|-----------|-----------------|--------------------|----------------------|
| 1               | 0.3184     | 2.653          | 0.00         | BB        | 7.5             | 352528             | 43044                |
| 2               | 1.5278     | 4.867          | 0.00         | BB        | 8.2             | 1691690            | 191686               |
| 3               | 0.2480     | 7.720          | 0.00         | BB        | 8.6             | 274561             | 33740                |
| 4               | 96.9297    | 12.333         | 0.00         | BB        | 13.8            | 107325128          | 7309652              |
| 5               | 0.3327     | 13.640         | 0.00         | BB        | 9.8             | 368346             | 33286                |
| 6               | 0.6434     | 18.120         | 0.00         | BB        | 11.5            | 712412             | 42976                |
| <b>100.0000</b> |            |                |              |           |                 | <b>110724656</b>   | <b>7654384</b>       |
